# Supplementary material
Source: publisher site journal article supplement (https://www.dovepress.com/article/366453)
Supplement: Supplementary file 1 [file get_supplementary_file.php]

**Supplementary Materials**

**Poor asthma control in schoolchildren may lead to lower lung function trajectory from childhood to early adulthood:**

**A Japanese cohort study**

Shingo Tsuneyoshi, Tomotaka Kawayama, Jun Sasaki, Takashi Kinoshita,

Chiyo Yano, Yoshihisa Tokunaga, Masanobu Matsuoka, Haruki Imaoka,

Kazuko Matsunaga, Kyoji Furukawa, and Tomoaki Hoshino

**Supplementary Tables**

**Supplementary Table 1. Asthma control level and scoring system by the Act**

| Disease control levels | Annual average number of exacerbations per a month in a past year | Score, point |
| --- | --- | --- |
| Very poor | moderate and severe ≥5 times or mild exacerbations ≥10 times | 1 |
| Poor | moderate and severe 1 to 4 times or mild exacerbations 5 to 9 times | 2 |
| Partly | no moderate and severe exacerbation and mild exacerbation 1 to 4 times | 3 |
| Well | no exacerbation and no respiratory symptoms | 4 |

**Notes:** Severe, moderate, and mild exacerbation was recognized as situations requiring hospitalization, administrations of systemic corticosteroids without hospitalization, and short-acting bronchodilations, respectively. Annual asthma control level was defined based on patient- or guardian-reported asthmatic symptoms and the monthly exacerbation rates once a year, and lung function levels by each chief physician.

**Supplementary Table 2. The odds ratio (95% CI) of population of children with ventilatory patterns in poor control group related to those in the good control group for each age group**

**A) Girls**

| Age, year |  | Poor control group |  | Good control group |  | odds ratio (95% CI) | | *P* value |
| --- | --- | --- | --- | --- | --- | --- | --- | --- |
|  | positive/total, n |  | positive/total, n |  |
| ***Restrictive ventilatory patterns*** | | | | | | | | |
| 6 |  | 2/21 |  | 2/13 |  | 0.57 | (0.07 to 4.71) | 0.6272 |
| 7 |  | 7/35 |  | 4/25 |  | 1.31 | (0.33 to 5.07) | 0.7484 |
| 8 |  | 7/39 |  | 2/30 |  | 3.06 | (0.59 to 16.00) | 0.2810 |
| 9 |  | 8/47 |  | 5/33 |  | 1.15 | (0.34 to 3.88) | 1.0000 |
| 10 |  | 7/47 |  | 0/21 |  |  |  | 0.0903 |
| 11 |  | 5/51 |  | 4/30 |  | 0.71 | (0.17 to 2.87) | 0.7197 |
| ***6 to 11*** |  | ***36/240*** |  | ***17/152*** |  | ***1.34*** | ***(0.78 to 2.30)*** | ***0.3631*** |
| 12 |  | 6/54 |  | 7/29 |  | 0.39 | (0.11 to 1.31) | 0.2033 |
| 13 |  | 5/55 |  | 4/25 |  | 0.53 | (0.13 to 2.15) | 0.4500 |
| 14 |  | 7/55 |  | 3/33 |  | 1.46 | (0.35 to 6.08) | 0.7372 |
| 15 |  | 12/50 |  | 4/26 |  | 2.05 | (0.60 to 7.07) | 0.3871 |
| 16 |  | 9/51 |  | 3/23 |  | 1.43 | (0.35 to 5.86) | 0.7430 |
| 17 |  | 6/51 |  | 1/28 |  | 3.60 | (0.41 to 31.53) | 0.4113 |
| ***12 to 17*** |  | ***45/316*** |  | ***22/164*** |  | ***1.06*** | ***(0.66 to 1.71)*** | ***0.8898*** |
| ***Obstructive ventilatory patterns*** | | | | | | | | |
| 6 |  | 7/21 |  | 4/13 |  | 1.13 | (0.25 to 4.98) | 1.0000 |
| 7 |  | 6/35 |  | 5/25 |  | 0.83 | (0.22 to 3.09) | 1.0000 |
| 8 |  | 7/39 |  | 4/30 |  | 1.42 | (0.37 to 5.39) | 0.7451 |
| 9 |  | 6/47 |  | 5/33 |  | 0.82 | (0.23 to 2.95) | 0.7544 |
| 10 |  | 12/47 |  | 1/21 |  | 6.86 | (0.83 to 56.71) | 0.0513 |
| 11 |  | 7/51 |  | 1/30 |  | 4.61 | (0.54 to 39.49) | 0.2470 |
| ***6 to 11*** |  | ***45/240*** |  | ***20/152*** |  | ***1.43*** | ***(0.88 to 2.32)*** | ***0.1647*** |
| 12 |  | 15/54 |  | 4/29 |  | 2.40 | (0.72 to 8.08) | 0.1794 |
| 13 |  | 11/55 |  | 2/25 |  | 2.88 | (0.59 to 14.08) | 0.2120 |
| 14 |  | 9/55 |  | 2/33 |  | 3.03 | (0.61 to 15.00) | 0.1976 |
| 15 |  | 4/50 |  | 1/30 |  | 2.52 | (0.27 to 23.69) | 0.6453 |
| 16 |  | 11/51 |  | 0/23 |  |  |  | 0.0141* |
| 17 |  | 10/51 |  | 2/28 |  | 3.17 | (0.64 to 15.64) | 0.1961 |
| ***12 to 17*** |  | ***60/316*** |  | ***11/168*** |  | ***2.90*** | ***(1.57 to 5.37)*** | ***0.0001**** |
| ***Mixed ventilatory patterns*** | | | | | | | | |
| 6 |  | 4/21 |  | 1/13 |  | 2.82 | (0.28 to 28.52) | 0.6272 |
| 7 |  | 2/35 |  | 2/25 |  | 0.70 | (0.09 to 5.31) | 1.0000 |
| 8 |  | 5/39 |  | 0/30 |  |  |  | 0.0639 |
| 9 |  | 4/47 |  | 0/33 |  |  |  | 0.1386 |
| 10 |  | 5/47 |  | 1/21 |  | 2.38 | (0.26 to 21.75) | 0.6578 |
| 11 |  | 1/51 |  | 0/30 |  |  |  | 1.0000 |
| ***6 to 11*** |  | ***21/240*** |  | ***4/152*** |  | ***3.33*** | ***(1.16 to 9.50)*** | ***0.0184**** |
| 12 |  | 9/54 |  | 0/29 |  |  |  | 0.0237* |
| 13 |  | 4/55 |  | 1/25 |  | 1.88 | (0.20 to 17.76) | 1.0000 |
| 14 |  | 2/55 |  | 0/33 |  |  |  | 0.5259 |
| 15 |  | 1/50 |  | 0/30 |  |  |  | 1.0000 |
| 16 |  | 5/51 |  | 0/23 |  |  |  | 0.3161 |
| 17 |  | 6/51 |  | 1/28 |  | 3.60 | (0.41 to 31.53) | 0.4113 |
| ***12 to 17*** |  | ***27/316*** |  | ***2/168*** |  | ***7.18*** | ***(1.73 to 29.83)*** | ***0.0005**** |

**Notes:** Girls in the poor control group had significantly higher proportion of children aged 6 to 11 years and 12 to 17 years with restrictive, obstructive, and mixed ventilatory patterns, but not obstructive ventilatory patterns in those aged 6 to 11 years, compared with those in the good control group.

**B) Boys**

| Age, year |  | Poor control group |  | Good control group |  | odds ratio (95% CI) | | *P* value |
| --- | --- | --- | --- | --- | --- | --- | --- | --- |
|  | positive/total, n |  | positive/total, n |  |
| ***Restrictive ventilatory patterns*** | | | | | | | | |
| 6 |  | 7/34 |  | 6/26 |  | 0.86 | (0.25 to 2.97) | 1.0000 |
| 7 |  | 5/52 |  | 7/40 |  | 0.50 | (0.15 to 1.72) | 0.3524 |
| 8 |  | 11/65 |  | 6/44 |  | 1.29 | (0.44 to 3.79) | 0.7898 |
| 9 |  | 8/60 |  | 6/43 |  | 0.95 | (0.30 to 2.96) | 1.0000 |
| 10 |  | 7/70 |  | 1/46 |  | 5.00 | (0.59 to 42.07) | 0.1436 |
| 11 |  | 10/71 |  | 4/39 |  | 1.43 | (0.42 to 4.92) | 0.7666 |
| ***6 to 11*** |  | ***48/352*** |  | ***30/238*** |  | ***1.08*** | ***(0.71 to 1.66)*** | ***0.8045*** |
| 12 |  | 8/68 |  | 6/47 |  | 0.91 | (0.29 to 2.82) | 1.0000 |
| 13 |  | 9/74 |  | 3/41 |  | 1.75 | (0.45 to 6.88) | 0.5338 |
| 14 |  | 11/77 |  | 3/36 |  | 1.83 | (0.48 to 7.02) | 0.5426 |
| 15 |  | 11/71 |  | 7/53 |  | 1.20 | (0.43 to 3.35) | 0.8006 |
| 16 |  | 7/59 |  | 2/44 |  | 2.83 | (0.56 to 14.33) | 0.2945 |
| 17 |  | 10/66 |  | 3/34 |  | 1.85 | (0.47 to 7.21) | 0.5338 |
| ***12 to 17*** |  | ***56/415*** |  | ***24/255*** |  | ***1.43*** | ***(0.91 to 2.25)*** | ***0.1405*** |
| ***Obstructive ventilatory patterns*** | | | | | | | | |
| 6 |  | 13/34 |  | 2/26 |  | 7.43 | (1.50 to 36.78) | 0.0076* |
| 7 |  | 10/52 |  | 0/40 |  |  |  | 0.0043* |
| 8 |  | 16/65 |  | 7/44 |  | 1.73 | (0.64 to 4.62) | 0.3423 |
| 9 |  | 13/60 |  | 4/43 |  | 2.70 | (0.81 to 8.94) | 0.1130 |
| 10 |  | 18/70 |  | 3/46 |  | 4.96 | (1.37 to 17.98) | 0.0124* |
| 11 |  | 12/71 |  | 3/39 |  | 2.44 | (0.64 to 9.24) | 0.2489 |
| ***6 to 11*** |  | ***82/352*** |  | ***19/238*** |  | ***2.92*** | ***(1.82 to 4.68)*** | ***<0.0001**** |
| 12 |  | 15/68 |  | 6/47 |  | 1.93 | (0.69 to 5.42) | 0.2301 |
| 13 |  | 12/74 |  | 2/41 |  | 3.77 | (0.80 to 17.78) | 0.1337 |
| 14 |  | 16/77 |  | 2/36 |  | 4.46 | (0.97 to 20.56) | 0.0524 |
| 15 |  | 7/71 |  | 3/53 |  | 1.82 | (0.45 to 7.41) | 0.5140 |
| 16 |  | 15/59 |  | 1/44 |  | 14.66 | (1.85 to 115.87) | 0.0017* |
| 17 |  | 13/66 |  | 4/34 |  | 1.84 | (0.55 to 6.15) | 0.4061 |
| ***12 to 17*** |  | ***78/415*** |  | ***18/255*** |  | ***2.66*** | ***(1.63 to 4.34)*** | ***<0.0001**** |
| ***Mixed ventilatory patterns*** | | | | | | | | |
| 6 |  | 1/34 |  | 0/26 |  |  |  | 1.0000 |
| 7 |  | 2/52 |  | 0/40 |  |  |  | 0.5031 |
| 8 |  | 5/65 |  | 3/44 |  | 1.14 | (0.26 to 5.03) | 1.0000 |
| 9 |  | 3/60 |  | 2/43 |  | 1.08 | (0.17 to 6.75) | 1.0000 |
| 10 |  | 6/70 |  | 0/46 |  |  |  | 0.0797 |
| 11 |  | 3/71 |  | 0/39 |  |  |  | 0.5509 |
| ***6 to 11*** |  | ***20/352*** |  | ***5/238*** |  | ***2.71*** | ***(1.03 to 7.11)*** | ***0.0375**** |
| 12 |  | 3/68 |  | 3/47 |  | 0.68 | (0.13 to 3.51) | 0.6871 |
| 13 |  | 1/74 |  | 0/41 |  |  |  | 1.0000 |
| 14 |  | 4/77 |  | 1/36 |  | 1.92 | (0.21 to 17.80) | 1.0000 |
| 15 |  | 2/71 |  | 0/53 |  |  |  | 0.5066 |
| 16 |  | 3/59 |  | 0/44 |  |  |  | 0.2587 |
| 17 |  | 3/66 |  | 3/34 |  | 0.49 | (0.09 to 2.58) | 0.4059 |
| ***12 to 17*** |  | ***16/415*** |  | ***7/255*** |  | ***1.40*** | ***(0.59 to 3.37)*** | ***0.5174*** |

**Notes:** Boys in the poor control group had significantly higher proportion of children with obstructive ventilatory patterns in the age groups of 6 to 11 years and 12 to 17 years, and mixed ventilatory patterns in the age group of 6 to 11 years, but with not mixed ventilatory patterns in those aged 12 to 17 years and restrictive ventilatory patterns, compared to those in the good control group.

**Supplementary Table 3. The odds ratios (95% CI) of girls and boys with restrictive, obstructive, and mixed ventilatory patterns in the poor control group related to those in the good control group at the age of 18, 19, and 20 years each, and from 18 to 19 years**

| Ventilatory patterns in each sex |  | Poor control group |  | Good control group |  | odds ratio (95% CI) | | *P* value |
| --- | --- | --- | --- | --- | --- | --- | --- | --- |
|  | positive/total, n |  | positive/total, n |  |
| **Girls** |  |  |  |  |  |  |  |  |
| 18 years |  |  |  |  |  |  |  |  |
| Restrictive |  | 8/41 |  | 6/24 |  | 0.78 | (0.31 to 1.98) | 0.7559 |
| Obstructive |  | 6/41 |  | 1/24 |  | 3.51 | (0.45 to 27.47) | 0.2458 |
| Mixed |  | 3/41 |  | 0/24 |  |  |  | 0.2904 |
| 19 years |  |  |  |  |  |  |  |  |
| Restrictive |  | 17/48 |  | 10/20 |  | 0.71 | (0.40 to 1.27) | 0.2885 |
| Obstructive |  | 10/48 |  | 0/20 |  |  |  | 0.0276* |
| Mixed |  | 4/48 |  | 0/20 |  |  |  | 0.3121 |
| 20 years |  |  |  |  |  |  |  |  |
| Restrictive |  | 10/45 |  | 11/26 |  | 0.53 | (0.26 to 1.07) | 0.1056 |
| Obstructive |  | 4/45 |  | 0/26 |  |  |  | 0.2891 |
| Mixed |  | 1/45 |  | 0/26 |  |  |  | 1.0 |
| 18 to 20 years$ |  |  |  |  |  |  |  |  |
| Restrictive |  | 19/57 |  | 27/70 |  | 0.88 | (0.54 to 1.39) | 0.5814 |
| Obstructive |  | 14/57 |  | 1/70 |  | 17.19 | (2.33 to 129.90) | <0.0001* |
| Mixed |  | 6/57 |  | 0/70 |  |  |  | 0.0007* |
|  |  |  |  |  |  |  |  |  |
| **Boys** |  |  |  |  |  |  |  |  |
| 18 years |  |  |  |  |  |  |  |  |
| Restrictive |  | 12/68 |  | 8/39 |  | 0.86 | (0.39 to 1.92) | 0.7983 |
| Obstructive |  | 7/68 |  | 3/39 |  | 1.34 | (0.37 to 4.88) | 0.7438 |
| Mixed |  | 2/38 |  | 0/39 |  |  |  | 0.5324 |
| 19 years |  |  |  |  |  |  |  |  |
| Restrictive |  | 37/54 |  | 25/33 |  | 0.90 | (0.69 to 1.18) | 0.6261 |
| Obstructive |  | 11/54 |  | 0/33 |  |  |  | 0.0056* |
| Mixed |  | 9/54 |  | 0/33 |  |  |  | 0.0119* |
| 20 years |  |  |  |  |  |  |  |  |
| Restrictive |  | 28/58 |  | 10/28 |  | 0.75 | (0.51 to 1.10) | 0.1762 |
| Obstructive |  | 16/58 |  | 4/24 |  | 1.93 | (0.71 to 5.24) | 0.2755 |
| Mixed |  | 12/58 |  | 4/24 |  | 1.45 | (0.51 to 4.09) | 0.5651 |
| 18 to 20 years$ |  |  |  |  |  |  |  |  |
| Restrictive |  | 52/90 |  | 51/99 |  | 1.12 | (0.86 to 1.46) | 0.4548 |
| Obstructive |  | 22/90 |  | 8/99 |  | 3.03 | (1.42 to 6.45) | 0.0026* |
| Mixed |  | 18/90 |  | 4/99 |  | 4.50 | (1.56 to 12.96) | 0.0019 |

**Notes:** Data were expressed as the numbers and odds ratios (95% CI). $The children were to undergo three tests between the ages of 18 and 20 years annually. All children tested between the ages of 18 and 20 years were divided into each group of restrictive, obstructive, and mixed ventilatory pattern, when at least one of the three tests was recognized as restrictive, obstructive, or mixed ventilatory pattern, respectively.

* P <0.05 between poor and good groups.

**Supplementary Table 4. The influence of asthma control levels under 6 years on lung functions in girls and boys at either 6 or 7 year of age.**

**A) The odds ratios (95% CI) of girls and boys with each ventilatory patterns in the poor control group under 6 years related to those in the good control group**

| Ventilatory patterns in each sex |  | Poor control group |  | Good control group |  | odds ratio (95% CI) | | *P* value |
| --- | --- | --- | --- | --- | --- | --- | --- | --- |
|  | positive/total, n |  | positive/total, n |  |
| **Girls** |  |  |  |  |  |  |  |  |
| 6 years |  |  |  |  |  |  |  |  |
| Restrictive |  | 1/14 |  | 1/12 |  | 0.87 | (0.06 to 12.53) | 1.0000 |
| Obstructive |  | 5/10 |  | 5/8 |  | 0.87 | (0.32 to 2.34) | 1.0000 |
| Mixed |  | 3/12 |  | 2/11 |  | 1.30 | (0.26 to 6.62) | 1.0000 |
| 7 years |  |  |  |  |  |  |  |  |
| Restrictive |  | 6/17 |  | 4/18 |  | 1.44 | (0.47 to 4.41) | 0.7222 |
| Obstructive |  | 4/19 |  | 4/18 |  | 0.96 | (0.27 to 3.36) | 1.0000 |
| Mixed |  | 2/21 |  | 1/21 |  | 1.91 | (0.19 to 19.64) | 1.0000 |
| 6 and/or 7 years$ |  |  |  |  |  |  |  |  |
| Restrictive |  | 7/17 |  | 5/29 |  | 1.98 | (0.71 to 5.51) | 0.2052 |
| Obstructive |  | 8/16 |  | 9/25 |  | 1.26 | (0.27 to 2.79) | 0.7703 |
| Mixed |  | 4/20 |  | 3/31 |  | 1.89 | (0.46 to 7.68) | 0.4324 |
|  |  |  |  |  |  |  |  |  |
| **Boys** |  |  |  |  |  |  |  |  |
| 6 years |  |  |  |  |  |  |  |  |
| Restrictive |  | 5/21 |  | 7/15 |  | 0.60 | (0.22 to 1.64) | 0.3408 |
| Obstructive |  | 11/15 |  | 1/21 |  | 9.31 | (1.30 to 66.56) | 0.0029* |
| Mixed |  | 0/26 |  | 0/22 |  |  |  |  |
| 7 years |  |  |  |  |  |  |  |  |
| Restrictive |  | 5/36 |  | 3/24 |  | 1.10 | (0.29 to 4.22) | 1.0000 |
| Obstructive |  | 6/35 |  | 0/27 |  |  |  | 0.0740 |
| Mixed |  | 1/40 |  | 0/27 |  |  |  | 1.0000 |
| 6 and/or 7 years$ |  |  |  |  |  |  |  |  |
| Restrictive |  | 9/33 |  | 10/38 |  | 1.03 | (0.46 to 2.29) | 1.0000 |
| Obstructive |  | 15/27 |  | 1/47 |  | 17.14 | (2.36 to 124.40) | <0.0001* |
| Mixed |  | 1/41 |  | 0/48 |  |  |  | 0.4667 |

**B) Between-group comparisons based on the asthma control levels under 6 years in the lung functions of girls and boys at 6 and/or 7 years of age.**

| Lung functions at 6 and/or 7 years |  | Poor control group under 6 yeas |  | Good control group under 6 yeas |  | *P* value |
| --- | --- | --- | --- | --- | --- | --- |
| **Girls,** poor control /total no. |  | n = 24/58 |  | n = 34/58 |  |  |
| %FVC predicted, % |  | 90.7 (19.8) |  | 94.1 (18.5) |  | 0.4581 |
| %FEV1 predicted, % |  | 76.5 (21.3) |  | 81.0 (19.4) |  | 0.3484 |
| FEV1/FVC ratio |  | 0.77 (0.12) |  | 0.79 (0.15) |  | 0.4096 |
|  |  |  |  |  |  |  |
| **Boys,** poor control /total no. |  | n = 42/90 |  | n = 48/90 |  |  |
| %FVC predicted, % |  | 94.2 (15.7) |  | 93.8 (15.7) |  | 0.8974 |
| %FEV1 predicted, % |  | 80.0 (16.7) |  | 88.2 (11.2) |  | 0.0021* |
| FEV1/FVC ratio |  | 0.79 (0.11) |  | 0.86 (0.10) |  | 0.0002* |

**Notes:** Data A), and B) were expressed as the numbers and odds ratios (95% CI), and mean (SD), respectively. $ The positive result was obtained in the ventilatory patterns at either 6 or 7 years of age. Among 505 children, 148 (girls = 58 and boys = 90) were assessed for asthma control levels under 6 years and underwent spirometry at either 6 or 7 year of age. Number (%) of girls and boys with poor asthma control under 6 years were 34 (58.6%) and 42 (46.7%), respectively. Poor and good asthma control levels were on average <4.0 and 4.0 of the scoring system under 6 years by the Act, respectively. The average scores (SD) in poor control group were 2.9 (0.3) for girls and 3.0 (0.2) for boys, respectively.

**Supplementary Table 5. The odds ratio (95% CI) of population of children with ventilatory patterns in poor control group related to those in the good control group** **for each age group by using the lower limit of normal criteria**

| Age, year |  | Poor control group |  | Good control group |  | odds ratio (95% CI) | | *P* value |
| --- | --- | --- | --- | --- | --- | --- | --- | --- |
|  | positive/total, n |  | positive/total, n |  |
| ***Restrictive ventilatory patterns*** | | | | | | | | |
| 6 |  | 2/21 |  | 1/13 |  | 1.26 | (0.10 to 15.49) | 1.0 |
| 7 |  | 3/35 |  | 0/25 |  |  |  | 0.2585 |
| ***6 and/or 7*** |  | ***5/38*** |  | ***1/38*** |  | ***5.60*** | ***(0.62 to 50.48)*** | ***0.1997*** |
| 8 |  | 1/39 |  | 1/30 |  | 0.76 | (0.05 to 12.72) | 1.0 |
| 9 |  | 3/47 |  | 0/33 |  |  |  | 0.2638 |
| 10 |  | 5/47 |  | 1/21 |  | 2.38 | (0.26 to 21.75) | 0.6578 |
| 11 |  | 1/51 |  | 0/30 |  |  |  | 1.0 |
| 12 |  | 1/54 |  | 4/29 |  | 0.11 | (0.01 to 1.11) | 0.0483* |
| 13 |  | 3/55 |  | 1/25 |  | 1.38 | (0.13 to 14.01) | 1.0 |
| 14 |  | 4/55 |  | 0/33 |  |  |  | 0.2925 |
| 15 |  | 4/50 |  | 1/30 |  | 2.52 | (0.27 to 23.69) | 0.6453 |
| 16 |  | 5/51 |  | 1/23 |  | 2.39 | (0.26 to 21.72) | 0.6587 |
| 17 |  | 6/51 |  | 0/28 |  |  |  | 0.0842 |
| 18 |  | 0/41 |  | 2/24 |  |  |  | 0.1327 |
| 19 |  | 2/46 |  | 4/19 |  | 0.17 | (0.03 to 1.03) | 0.0554 |
| 20 |  | 1/45 |  | 1/26 |  | 0.57 | (0.03 to 9.48) | 1.0 |
| ***18 to 20*** |  | ***3/56*** |  | ***7/69*** |  | ***0.50*** | ***(0.12 to 2.04)*** | ***0.5097*** |
| ***Obstructive ventilatory patterns*** | | | | | | | | |
| 6 |  | 2/21 |  | 0/13 |  |  |  | 0.5134 |
| 7 |  | 2/35 |  | 2/25 |  | 0.70 | (0.09 to 5.31) | 1.0 |
| ***6 and/or 7*** |  | ***4/38*** |  | ***2/38*** |  | ***2.11*** | ***(0.36 to 12.32)*** | ***0.6745*** |
| 8 |  | 2/39 |  | 1/30 |  | 1.57 | (0.14 to 18.15) | 1.0 |
| 9 |  | 3/47 |  | 1/33 |  | 2.18 | (0.22 to 21.95) | 0.6391 |
| 10 |  | 3/47 |  | 0/21 |  |  |  | 0.5470 |
| 11 |  | 2/51 |  | 0/30 |  |  |  | 0.5278 |
| 12 |  | 6/54 |  | 0/29 |  |  |  | 0.0867 |
| 13 |  | 6/55 |  | 0/25 |  |  |  | 0.1693 |
| 14 |  | 3/55 |  | 1/33 |  | 1.85 | (0.18 to 18.52) | 1.0 |
| 15 |  | 1/50 |  | 1/30 |  | 0.59 | (0.04 to 9.83) | 1.0 |
| 16 |  | 2/51 |  | 0/23 |  |  |  | 1.0 |
| 17 |  | 3/51 |  | 0/28 |  |  |  | 0.5486 |
| 18 |  | 3/41 |  | 0/24 |  |  |  | 0.2904 |
| 19 |  | 1/46 |  | 0/19 |  |  |  | 1.0 |
| 20 |  | 1/45 |  | 0/26 |  |  |  | 1.0 |
| ***18 to 20*** |  | ***4/56*** |  | ***0/69*** |  |  |  | ***0.0379**** |
| ***Mixed ventilatory patterns*** | | | | | | | | |
| 6 |  | 0/21 |  | 0/13 |  |  |  |  |
| 7 |  | 0/35 |  | 0/25 |  |  |  |  |
| ***6 and/or 7*** |  | ***0/38*** |  | ***0/38*** |  |  |  |  |
| 8 |  | 1/39 |  | 0/30 |  |  |  | 1.0 |
| 9 |  | 1/47 |  | 0/33 |  |  |  | 1.0 |
| 10 |  | 0/47 |  | 0/21 |  |  |  |  |
| 11 |  | 0/51 |  | 0/30 |  |  |  |  |
| 12 |  | 1/54 |  | 0/29 |  |  |  | 1.0 |
| 13 |  | 1/55 |  | 0/25 |  |  |  | 1.0 |
| 14 |  | 0/55 |  | 0/33 |  |  |  |  |
| 15 |  | 0/50 |  | 0/30 |  |  |  | 1.0000 |
| 16 |  | 0/51 |  | 0/23 |  |  |  |  |
| 17 |  | 0/51 |  | 0/28 |  |  |  |  |
| 18 |  | 2/41 |  | 0/24 |  |  |  | 0.5269 |
| 19 |  | 0/46 |  | 0/19 |  |  |  |  |
| 20 |  | 0/45 |  | 0/26 |  |  |  |  |
| ***18 to 20*** |  | ***2/56*** |  | ***0-69*** |  |  |  | ***0.1987*** |

**A) Girls**

**B) Boys**

| Age, year |  | Poor control group |  | Good control group |  | odds ratio (95% CI) | | *P* value |
| --- | --- | --- | --- | --- | --- | --- | --- | --- |
|  | positive/total, n |  | positive/total, n |  |
| ***Restrictive ventilatory patterns*** | | | | | | | | |
| 6 |  | 1/34 |  | 0/26 |  |  |  | 1.0 |
| 7 |  | 0/52 |  | 2/40 |  | 0.76 | (0.10 to 5.64) | 1.0 |
| ***6 and/or 7*** |  | ***3/59*** |  | ***2/65*** |  | ***1.69*** | ***(0.27 to 10.47)*** | ***0.6681*** |
| 8 |  | 2/65 |  | 2/44 |  | 0.67 | (0.09 to 4.92) | 1.0 |
| 9 |  | 4/60 |  | 1/43 |  | 3.00 | (0.32 to 27.83) | 0.3975 |
| 10 |  | 0/70 |  | 0/46 |  |  |  |  |
| 11 |  | 5/71 |  | 2/39 |  | 1.40 | (0.26 to 7.58) | 1.0 |
| 12 |  | 3/68 |  | 1/47 |  | 2.12 | (0.21 to 21.06) | 0.6438 |
| 13 |  | 3/74 |  | 1/41 |  | 1.69 | (0.17 to 16.79) | 1.0 |
| 14 |  | 4/77 |  | 0/36 |  |  |  | 0.3047 |
| 15 |  | 3/71 |  | 1/53 |  | 2.29 | (0.23 to 22.69) | 0.6350 |
| 16 |  | 2/59 |  | 0/44 |  |  |  | 0.5058 |
| 17 |  | 3/66 |  | 0/34 |  |  |  | 0.5490 |
| 18 |  | 2/68 |  | 1/39 |  | 1.15 | (0.10 to 13.12) | 1.0 |
| 19 |  | 3/51 |  | 1/32 |  | 1.94 | (0.19 to 19.48) | 1.0 |
| 20 |  | 1/53 |  | 2/27 |  | 0.24 | (0.02 to 2.78) | 0.2620 |
| ***18 to 20*** |  | ***4/88*** |  | ***4/93*** |  | ***1.11*** | ***(0.27 to 4.57)*** | ***1.0*** |
| ***Obstructive ventilatory patterns*** | | | | | | | | |
| 6 |  | 3/34 |  | 0/26 |  |  |  | 0.2508 |
| 7 |  | 3/52 |  | 0/40 |  |  |  | 0.2547 |
| ***6 and/or 7*** |  | ***6/59*** |  | ***0/65*** |  |  |  | ***0.0101**** |
| 8 |  | 4/65 |  | 1/44 |  | 2.82 | (0.30 to 26.11) | 0.6463 |
| 9 |  | 4/60 |  | 1/43 |  | 3.00 | (0.32 to 27.83) | 0.3975 |
| 10 |  | 4/70 |  | 2/46 |  | 1.33 | (0.23 to 7.59) | 1.0 |
| 11 |  | 5/71 |  | 2/39 |  | 1.40 | (0.26 to 7.58) | 1.0 |
| 12 |  | 4/68 |  | 0/47 |  |  |  | 0.1436 |
| 13 |  | 3/74 |  | 0.41 |  |  |  | 0.5515 |
| 14 |  | 4/77 |  | 1/36 |  | 1.92 | (0.21 to 17.80) | 1.0 |
| 15 |  | 6/71 |  | 2/53 |  | 2.35 | (0.46 to 12.16) | 0.4645 |
| 16 |  | 7/59 |  | 0/44 |  |  |  | 0.0192* |
| 17 |  | 4/66 |  | 2/34 |  | 1.03 | (0.18 to 5.94) | 1.0 |
| 18 |  | 3/68 |  | 1/39 |  | 1.75 | (0.18 to 17.46) | 1.0 |
| 19 |  | 5/51 |  | 0/32 |  |  |  | 0.1510 |
| 20 |  | 4/53 |  | 2/27 |  | 1.02 | (0.17 to 5.96) | 1.0 |
| ***18 to 20*** |  | ***7/88*** |  | ***3/97*** |  | ***2.71*** | ***(0.68 to 10.81)*** | ***0.1966*** |
| ***Mixed ventilatory patterns*** | | | | | | | | |
| 6 |  | 0/34 |  | 0/24 |  |  |  |  |
| 7 |  | 0/52 |  | 0/40 |  |  |  |  |
| ***6 and/or 7*** |  | ***0/59*** |  | ***0/65*** |  |  |  |  |
| 8 |  | 1/65 |  | 0/44 |  |  |  | 1.0 |
| 9 |  | 0/60 |  | 0/43 |  |  |  |  |
| 10 |  | 3/70 |  | 0/46 |  |  |  | 0.2759 |
| 11 |  | 1/71 |  | 0/39 |  |  |  | 1.0 |
| 12 |  | 0/68 |  | 0/47 |  |  |  |  |
| 13 |  | 074 |  | 0/41 |  |  |  |  |
| 14 |  | 1/77 |  | 0/36 |  |  |  | 1.0 |
| 15 |  | 1/71 |  | 0/53 |  |  |  | 1.0 |
| 16 |  | 0/59 |  | 0/44 |  |  |  |  |
| 17 |  | 1/66 |  | 0/34 |  |  |  | 1.0 |
| 18 |  | 1/68 |  | 0/39 |  |  |  | 1.0 |
| 19 |  | 1/51 |  | 0/32 |  |  |  | 1.0 |
| 20 |  | 2/53 |  | 0/27 |  |  |  | 0.5472 |
| ***18 to 20*** |  | ***3/88*** |  | ***0/97*** |  |  |  | ***0.1092*** |

**Supplementary Figures and figure legends**

**Supplementary Figure 1. Between-group comparisons in annual evaluations for disease-control levels (A) and lung functions (B) between the population of girls and boys from the ages of 6 years to 17 years**


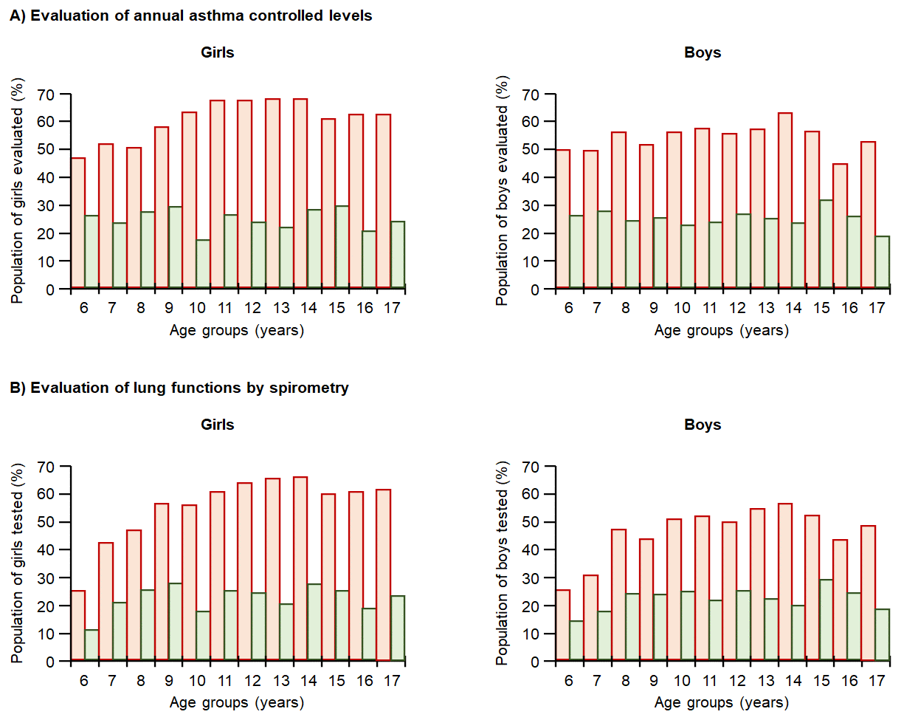


**Notes:** The poor control group (red bars) had a significantly higher proportion of both girls and boys who were underwent annual evaluations for disease-control levels (A) and lung functions (B) than the good control group (green bars), in all age groups. The mean proportions of girls and boys (age: 6–17 years) who underwent annual evaluations for disease-control levels and lung functions were 60.2% (47.0 to 69.9) and 53.7% (44.4 to 63.7), and 47.6% (25.2 to 57.0) and 55.3% (25.3 to 66.3), respectively, in the poor control group. The corresponding values in the good control group were 24.9% (21.2 to 29.7) and 25.1% (19.4 to 31.1), and 22.8% (14.4 to 29.4) and 22.6% (11.0 to 28.0), respectively. These annual evaluations were performed in approximately half and quarter of the children in the poor and good control groups, respectively. The disease-control levels may influence the evaluation rates at clinics.

**Supplementary Figure 2. Between-group comparisons of the growth slopes in body physiques and lung functions at 6–11 years-old and 12–18 years-old according to sex difference**


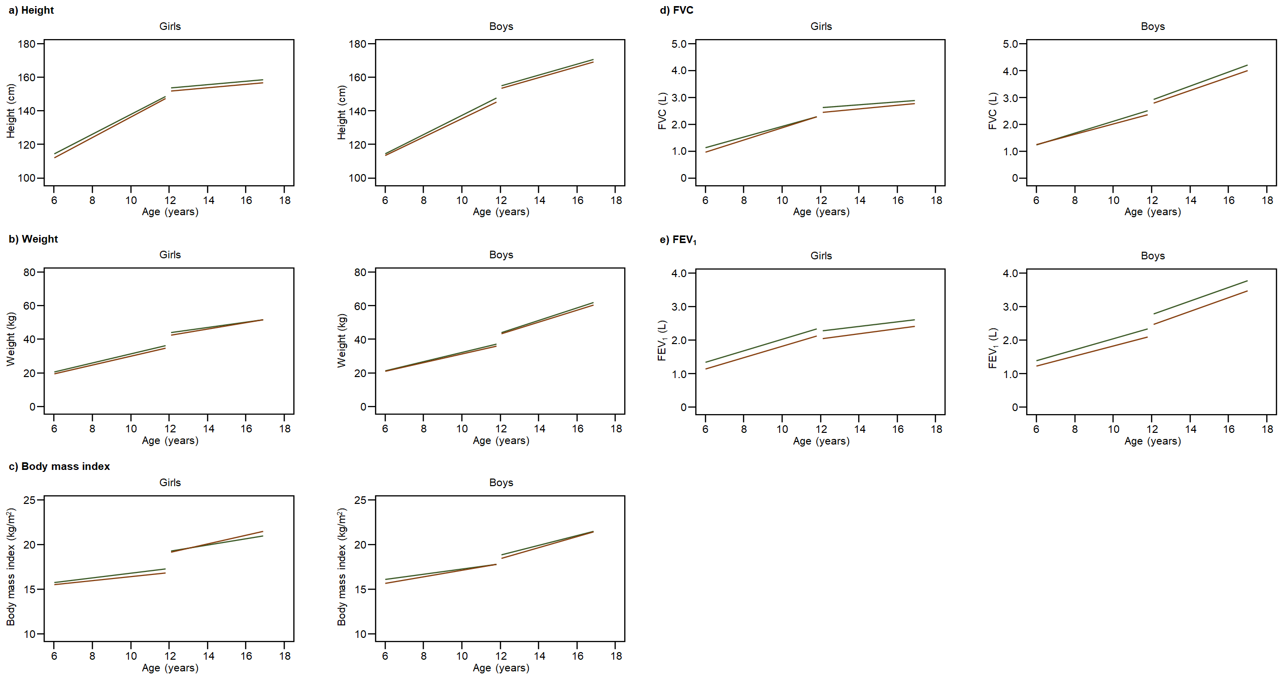


**Notes:** The slope difference (/year [SD]) of growth between poor (red lines) and good (green lines) control groups was expressed as annual changes at 6–11 years-old and 12–17 years-old according to sex differences. a) There were no significant differences in the slope differences of height growth from 6 to 11 years and from 12 to 17 years for girls (0.01 [0.16] and 0.14 [0.13] cm, respectively) and boys (0.03 [0.11] and 0.17 [0.19] cm, respectively). b) There were no significant differences in the slope differences of weight growth from 6 to 11 years and from 12 to 17 years for girls (0.26 [0.18] and 0.40 [0.19] kg, respectively) and boys (0.10 [0.14] and 0.04 [0.18] kg, respectively). c) Among girls, the poor control group had a slightly greater slope differences of BMI growth than the good control group from 12 to 17 years (0.20 [0.06] kg/m2, *P* = 0.001), but not from 6 to 11 years (0.08 [0.08] kg/m2). Contrastingly, among boys, there was no significant difference in the slope differences from 6 to 11 years (0.03 [0.06] kg/m2) and from 12 to 17 years (0.06 [0.05] kg/m2). d) There were no significant differences in the slope differences of FVC growth from 6 to 11 years and from 12 to 17 years for girls (1 [20] and 13 [17] mL, respectively) and boys (30 [16] and 9 [17] mL, respectively). e) There were no significant differences in the slope differences of FEV1 growth from 6 to 11 years and from 12 to 17 years for girls (16 [18] and 3 [17] mL, respectively) and boys (24 [14] and 3 [17] mL, respectively).

**Abbreviation:** BMI, body mass index; FVC, forced vital capacity; FEV1, forced expiratory volume in 1 second
